# Supplementary figures and images for: The initial adsorption process of benzene in double-walled carbon nanotubes studied by in situ solid-state NMR
Source: Royal Society of Chemistry journal article supplement (doi:10.1039/c5ra12490e), 2015-01-01

Supporting Information

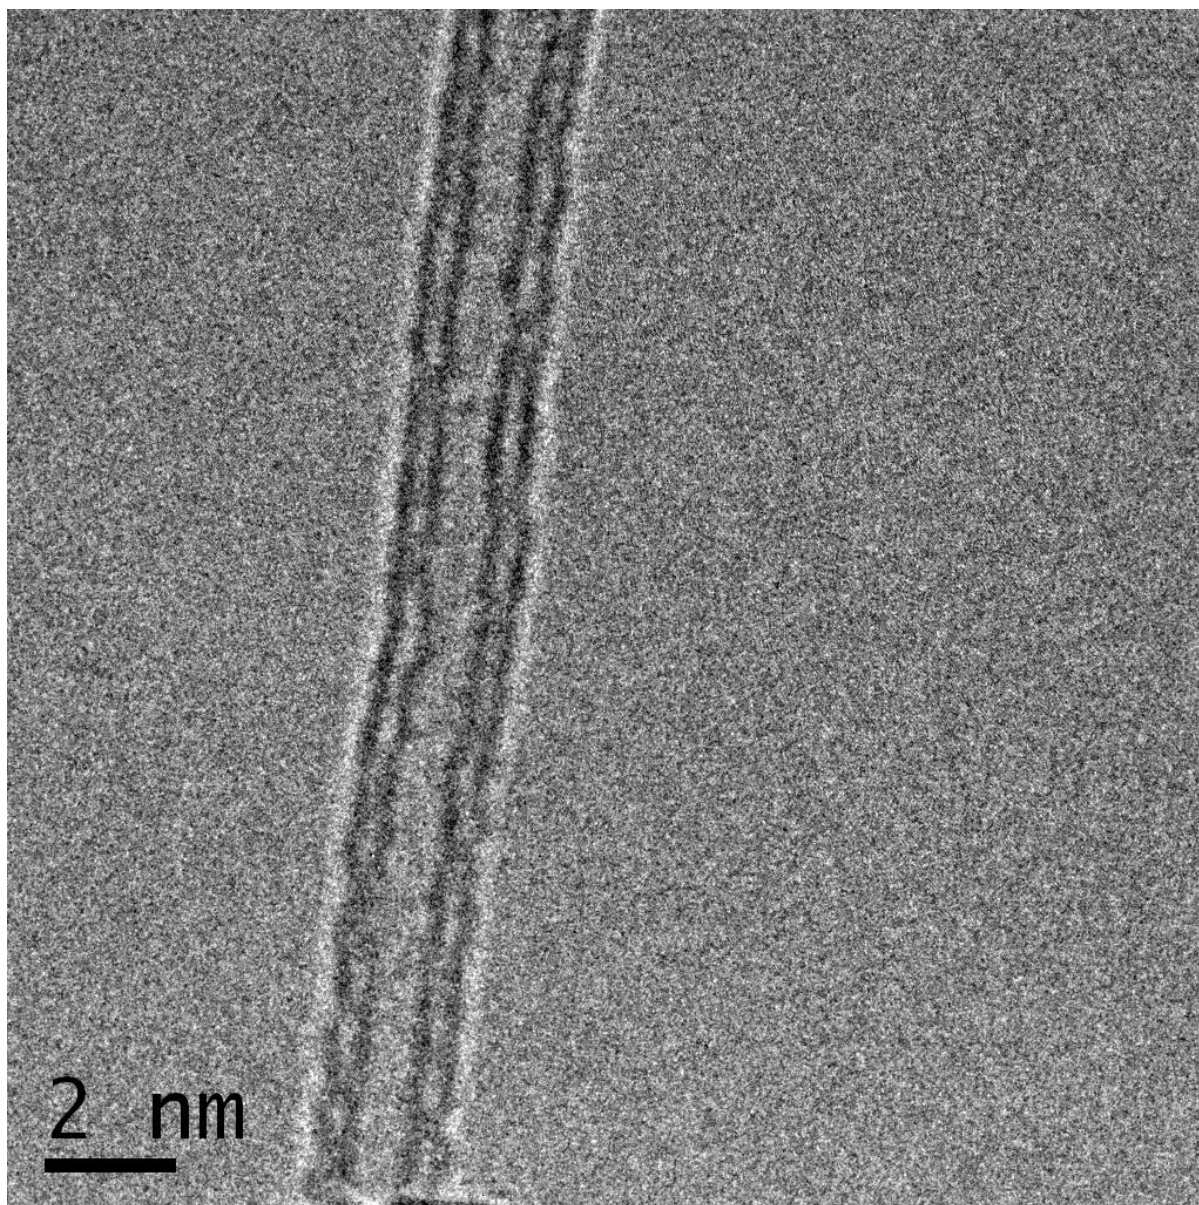

Supplement: c5ra12490e1.pdf [file c5ra12490e1.pdf]
